# Supplementary material for: Mesoscale simulation of biomembranes with FreeDTS
Source: PubMed Central journal article supplement (PMC10792169; doi:10.1038/s41467-024-44819-w), 2024-01-16
Supplement: 41467_2024_44819_MOESM3_ESM.pdf [file 41467_2024_44819_MOESM3_ESM.pdf]

## **Description of additional supplementary files**

**Supplementary Movie 1** : Pulling a nanotube from a membrane patch with periodic boundary conditions by exerting a harmonic force on a single vertex.
